# Supplementary material for: powerTCR: A model-based approach to comparative analysis of the clone size distribution of the T cell receptor repertoire
Source: PLOS journal article supplement (doi:10.1371/journal.pcbi.1006571), 2018-11-28
Supplement: S3 (10.1371/journal.pcbi.1006571.s003) [file journal.pcbi.1006571.s003]

Supplementary file 3 — Correlation between  $\xi$  and clonality

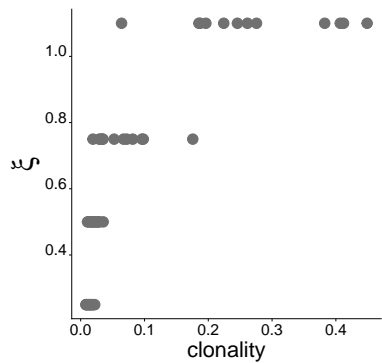

Figure A: Scatterplot of clonality versus  $\xi$  on 48 simulated datasets, described in *Correlation between  $\xi$  and clonality* in the Methods section.

Table A: Estimates of clonality compared against  $\xi$  for 48 simulated samples described in *Correlation between  $\xi$  and clonality* in the Methods section.

| $\xi$ | clonality |        |        |        |        |        |        |        |        |        |        |        |
|-------|-----------|--------|--------|--------|--------|--------|--------|--------|--------|--------|--------|--------|
| 0.25  | 0.0183    | 0.0188 | 0.0197 | 0.0220 | 0.0127 | 0.0141 | 0.0143 | 0.0150 | 0.0080 | 0.0090 | 0.0097 | 0.0097 |
| 0.50  | 0.0234    | 0.0271 | 0.0295 | 0.0352 | 0.0173 | 0.0191 | 0.0230 | 0.0264 | 0.0107 | 0.0121 | 0.0190 | 0.0156 |
| 0.75  | 0.0350    | 0.0960 | 0.0816 | 0.0672 | 0.0337 | 0.0723 | 0.1757 | 0.0981 | 0.0192 | 0.0290 | 0.0319 | 0.0524 |
| 1.10  | 0.1874    | 0.2757 | 0.3825 | 0.2613 | 0.2457 | 0.1962 | 0.2242 | 0.4069 | 0.0641 | 0.1853 | 0.4120 | 0.4490 |
