# Supplementary material for: powerTCR: A model-based approach to comparative analysis of the clone size distribution of the T cell receptor repertoire
Source: PLOS journal article supplement (doi:10.1371/journal.pcbi.1006571), 2018-11-28

**Supplementary file 6 — Dendrograms for downsampling study**

We downsampled mouse tumor data to 80, 60, 40, and 20% of total reads. We used JSD to compute pairwise distances between the samples for our model and the Desponds et al. model at each downsample level and did hierarchical clustering using Ward’s method. The dendrograms for each model at each downsample level are presented here.

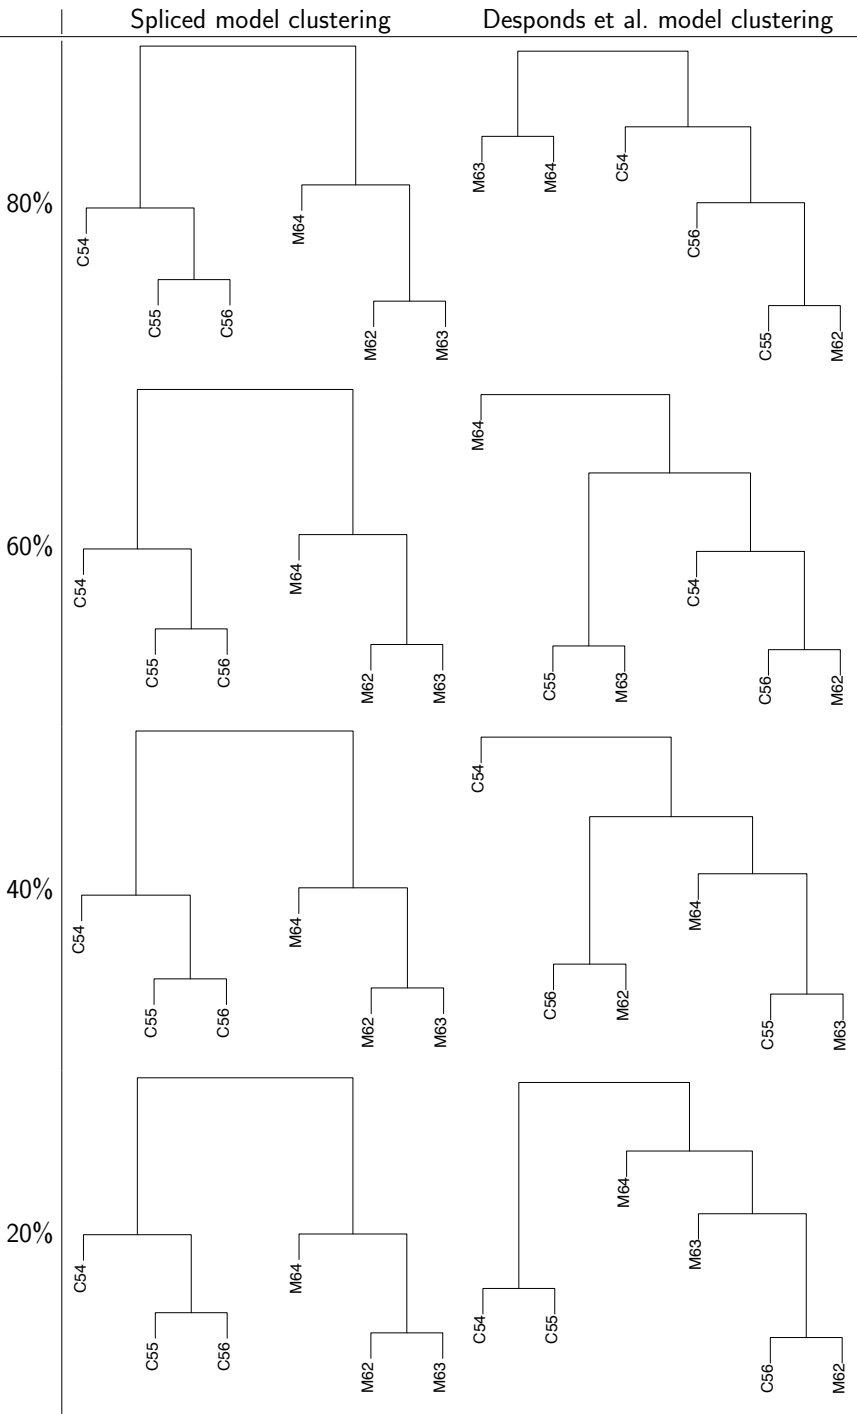

Supplement: S6 (10.1371/journal.pcbi.1006571.s006) [file journal.pcbi.1006571.s006]
